# Supplementary material
Source: publisher site journal article supplement (https://www.dovepress.com/article/222879)

## SUPPLEMENTARY MATERIAL

**Table 1S. Baseline Characteristics of the Patients included in the RATIFY study**

|                                                                      | All Patients<br>(N = 717) | Midostaurin Group<br>(N = 360) | Placebo<br>Group<br>(N = 357) |
|----------------------------------------------------------------------|---------------------------|--------------------------------|-------------------------------|
| Age at trial entry — yr                                              |                           |                                |                               |
| Median                                                               | 47.9                      | 47.1                           | 48.6                          |
| Range                                                                | 18.0–60.9                 | 19.0–59.8                      | 18.0–60.9                     |
| Female sex — no. (%)                                                 | 398 (55.5)                | 186 (51.7)                     | 212 (59.4)                    |
| Race — no./total no. (%)†                                            |                           |                                |                               |
| White                                                                | 275/309 (89.0)            | 147/165 (89.1)                 | 128/144 (88.9)                |
| Other                                                                | 34/309 (11.0)             | 18/165 (10.9)                  | 16/144 (11.1)                 |
| Subtype of <i>FLT3</i> mutation — no.<br>(%)‡                        |                           |                                |                               |
| TKD 162 (22.6) 81 (22.5) 81 (22.7)                                   |                           |                                |                               |
| ITD with low allelic ratio                                           | 341 (47.6)                | 171 (47.5)                     | 170 (47.6)                    |
| ITD with high allelic ratio                                          | 214 (29.8)                | 108 (30.0)                     | 106 (29.7)                    |
| Modified European LeukemiaNet<br>classification — no./total no. (%)§ |                           |                                |                               |
| Favorable                                                            | 29/547 (5.3)              | 16/269 (5.9)                   | 13/278 (4.7)                  |
| Normal                                                               | 375/547 (68.6)            | 172/269 (63.9)                 | 203/278 (73.0)                |
| Intermediate II                                                      | 104/547 (19.0)            | 59/269 (21.9)                  | 45/278 (16.2)                 |
| Adverse                                                              | 39/547 (7.1)              | 22/269 (8.2)                   | 17/278 (6.1)                  |
| White-cell count per µl¶                                             |                           |                                |                               |
| Median                                                               | 34,900                    | 35,600                         | 33,000                        |
| Range                                                                | 600–421,800               | 600–421,800                    | 800–329,800                   |
| Platelet count per µl                                                |                           |                                |                               |
| Median                                                               | 50,000                    | 50,000                         | 50,000                        |
| Range                                                                | 2000–461,000              | 2000–461,000                   | 8000–444,000                  |
| Absolute neutrophil count per<br>mm <sup>3</sup> **                  |                           |                                |                               |
| Median                                                               | 2.2                       | 2.2                            | 2.3                           |
| Range                                                                | 0–55.9                    | 0–55.9                         | 0–55.9                        |

† Race was reported by the patients. Race was not reported for European patients (195 in the midostaurin group, and 213 in the placebo group).

‡ The subtypes of the *FLT3* mutation are point mutation in the tyrosine kinase domain (TKD) or internal tandem duplication (ITD) mutation with either a high ratio (>0.7) or a low ratio (0.05 to 0.7) of mutant to wild-type alleles.

§ Cytogenetic data according to a modified European LeukemiaNet classification were available for 547 patients (269 in the midostaurin group, and 278 in the placebo group). Data on mutations in the nucleophosmin gene (*NPM1*) or the CCAAT/enhancer binding protein alpha gene (*CEBPA*) are not included. A classification of favorable indicated the presence of t(8;21) and inv(16) or t(16;16), normal the presence of a normal karyotype, intermediate II the presence of cytogenetic abnormalities that were not classified as favorable or adverse, and adverse the presence of adverse-risk cytogenetic abnormalities.

¶ Data were available for 707 patients (355 in the midostaurin group, and 352 in the placebo group).

|| Data were available for 702 patients (351 in the midostaurin group, and 351 in the placebo group).

\*\* Data were available for 673 patients (339 in the midostaurin group, and 334 in the placebo group).

This table was taken from: Stone RM, Mandrekar SJ, Sanford BL, et al. Midostaurin plus Chemotherapy for Acute Myeloid Leukemia with a *FLT3* Mutation. *N Engl J Med*. 2017;377(5):454-464. doi:10.1056/NEJMoa1614359

**Figure 1S. Model outcomes and traces with midostaurin (a) or with standard chemotherapy (b)**

**a) Midostaurin**

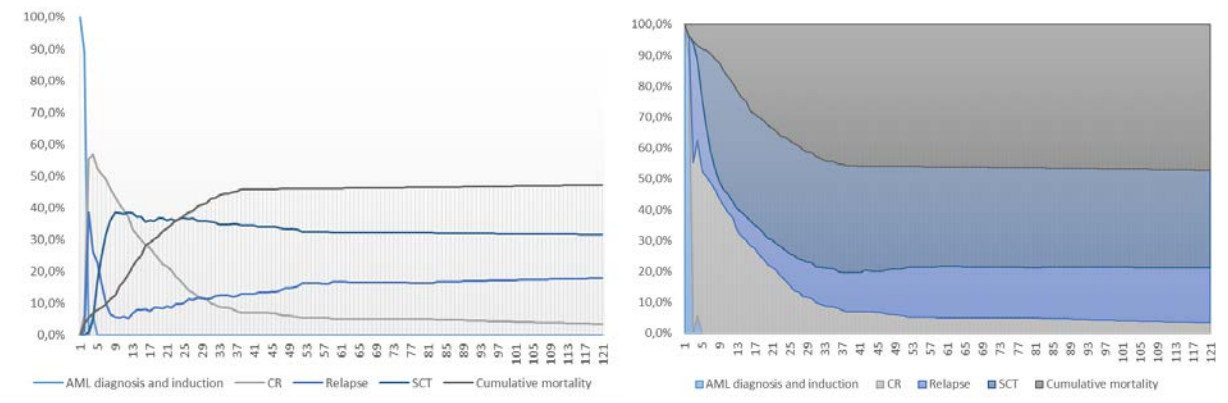

**b) Standard chemotherapy**

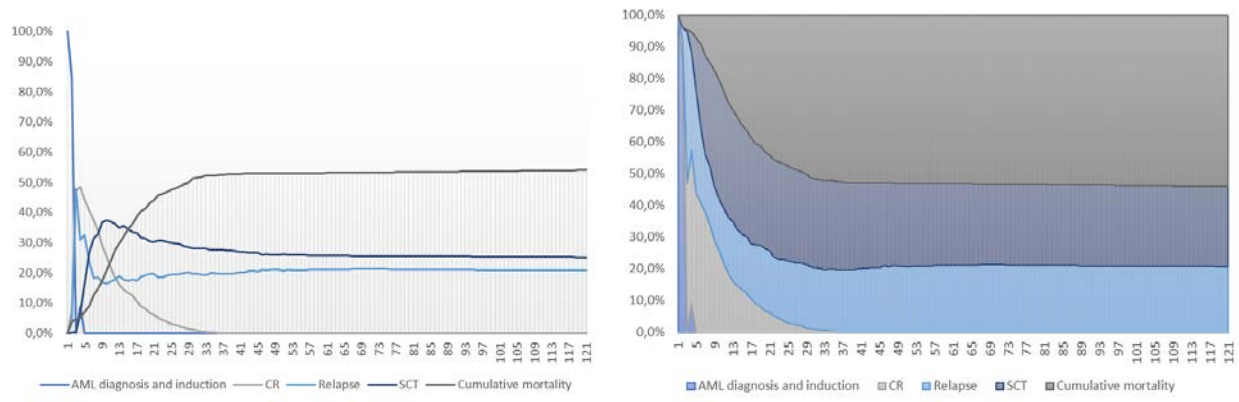

Figure 2S. Proportion of patients reaching each treatment line in the RATIFY study

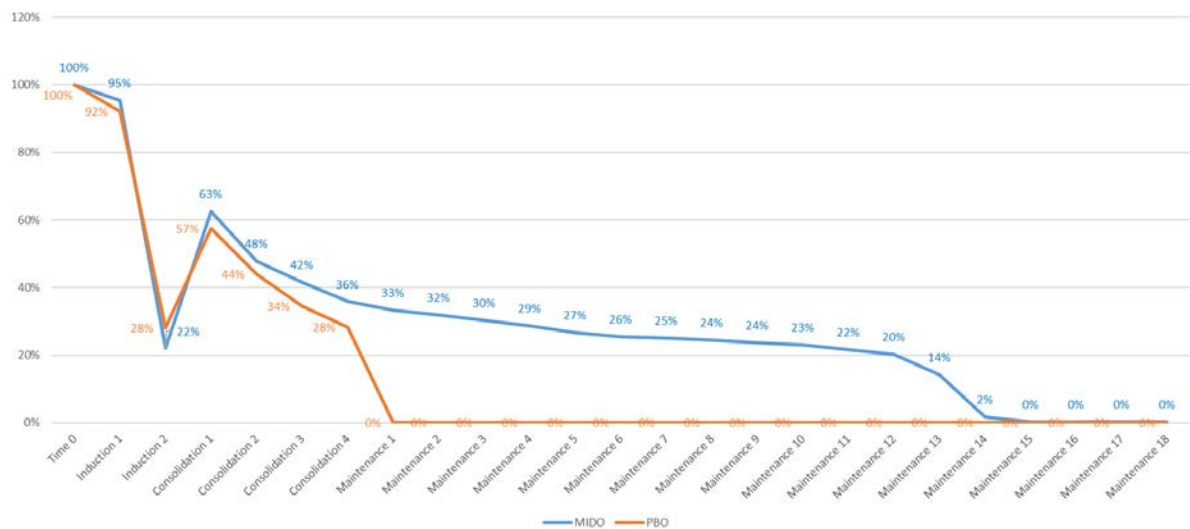

Supplement: Supplementary file 1 [file get_supplementary_file.php]
